# Supplementary material
Source: publisher figshare collection journal article supplement (https://sage.figshare.com/ndownloader/files/18091001)

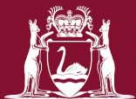

Government of **Western Australia**  
North Metropolitan Health Service  
Sir Charles Gairdner Osborne Park Health Care Group

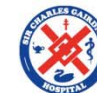

# Case 1 56 year old man undergoing this treatment (Figure 2) 8 week flexion

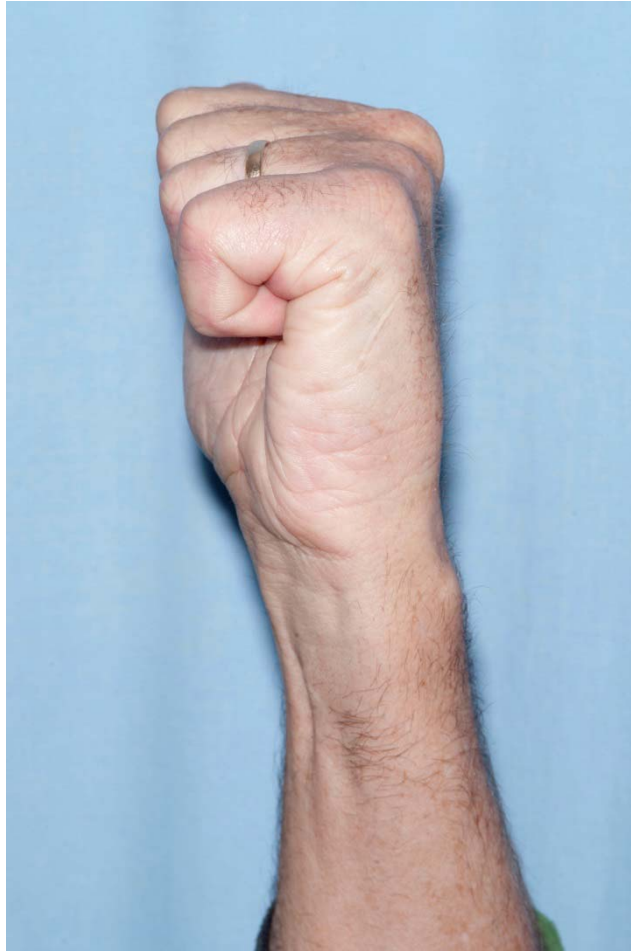

# Case 1

8 week extension

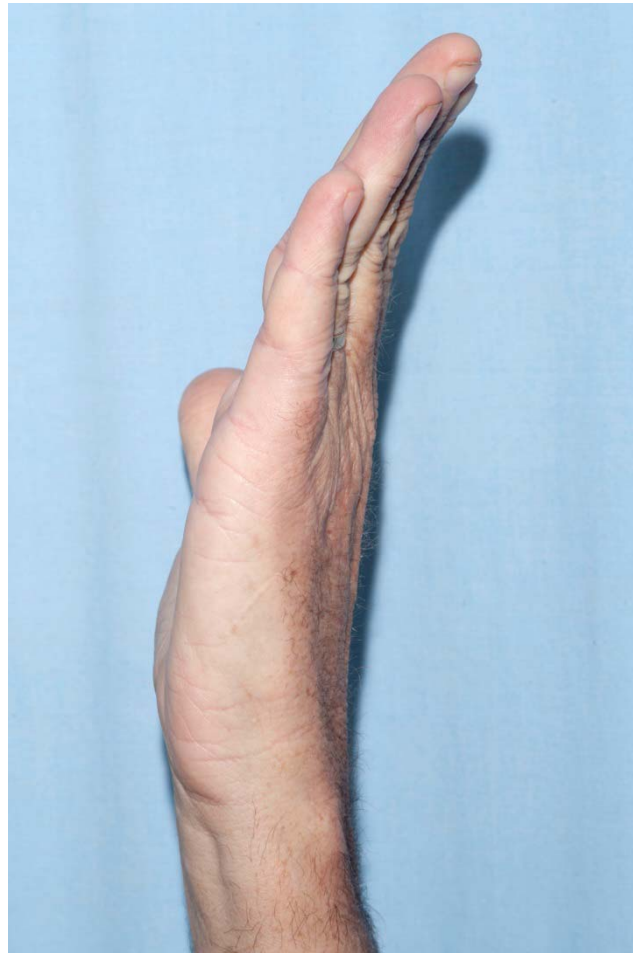

# Case 2

17 year old male, initial presentation, AP view, right index  
finger

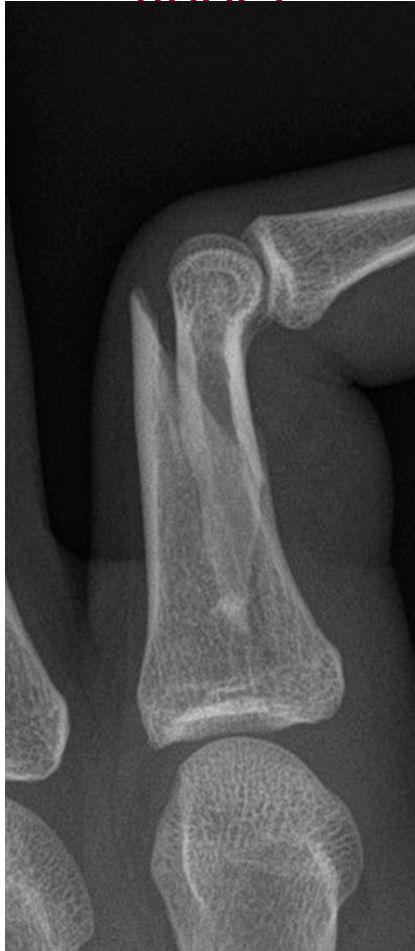

## Case 2

2 weeks post reduction, PA view

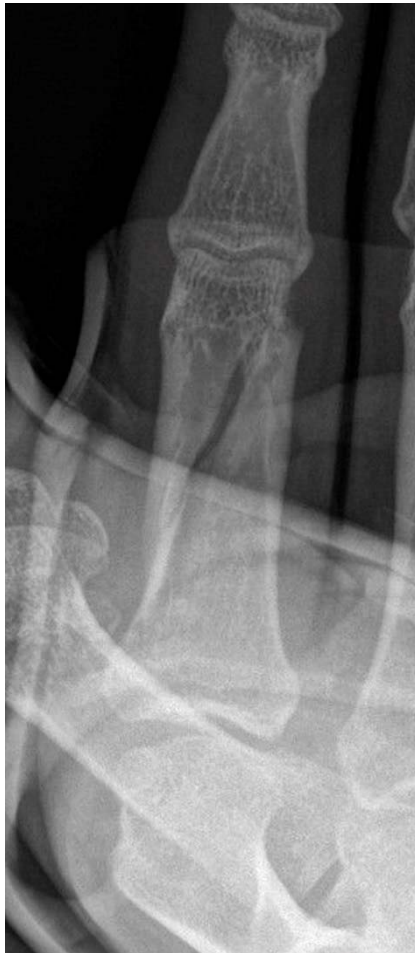

# Case 2

4 week extension

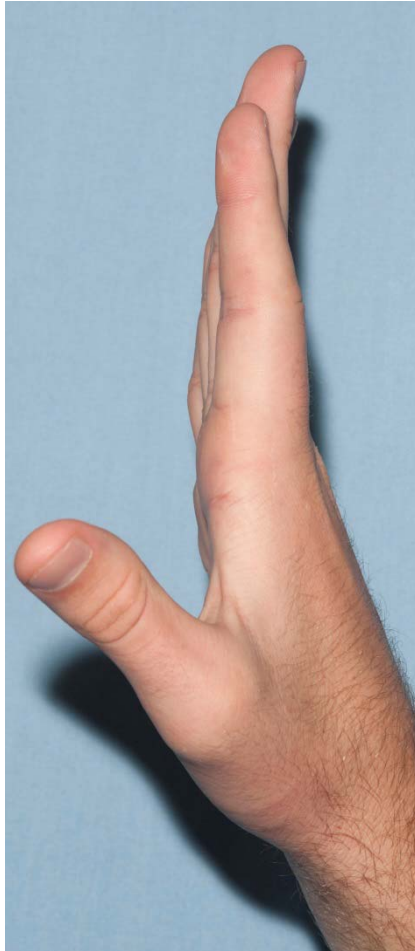

# Case 2

4 week flexion

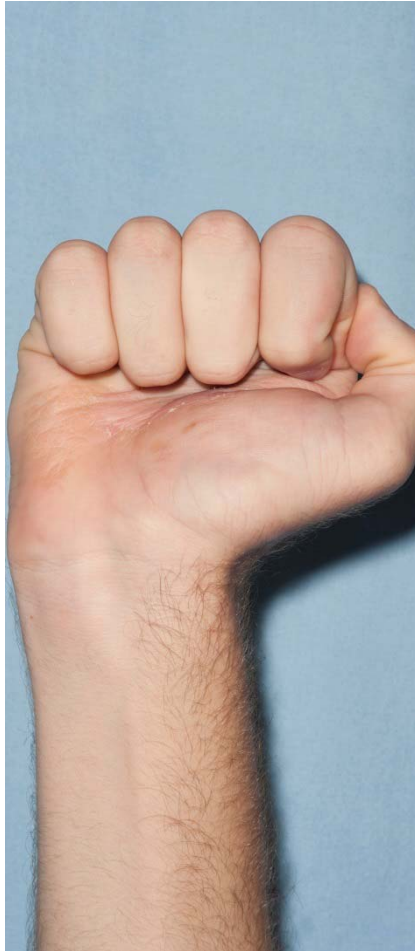

# Case 2

4 week AROM: video

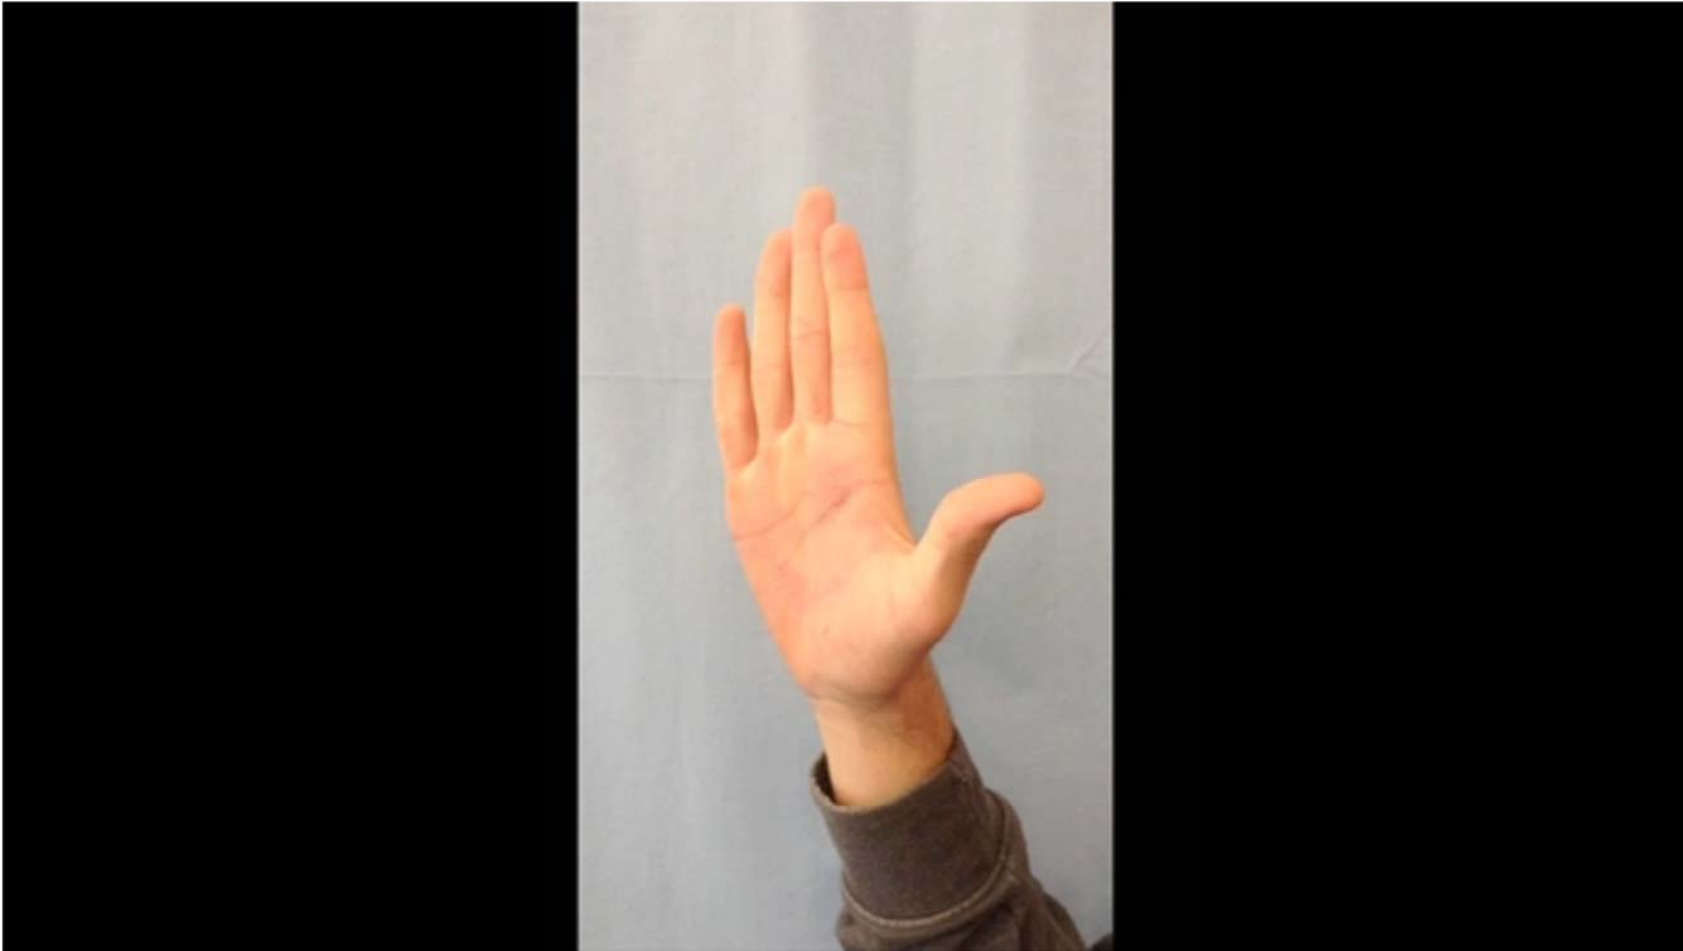

# Case 3

19 year old male, initial presentation, lateral view, left  
middle finger

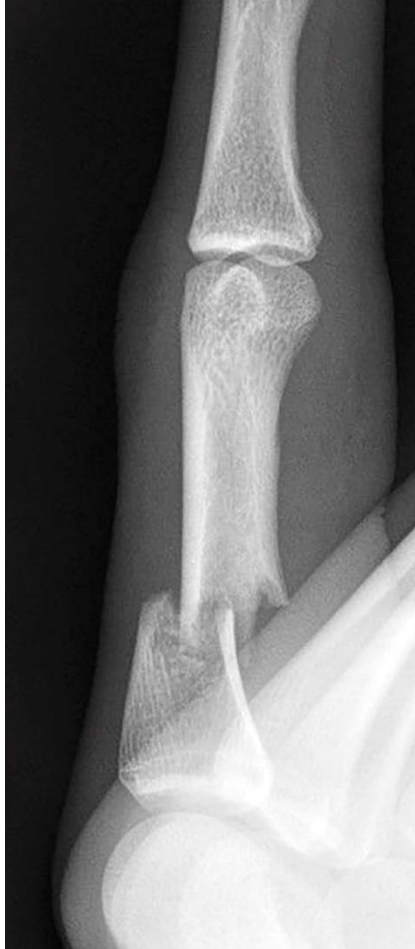

## Case 3

Post reduction, immediate AROM in splint: video

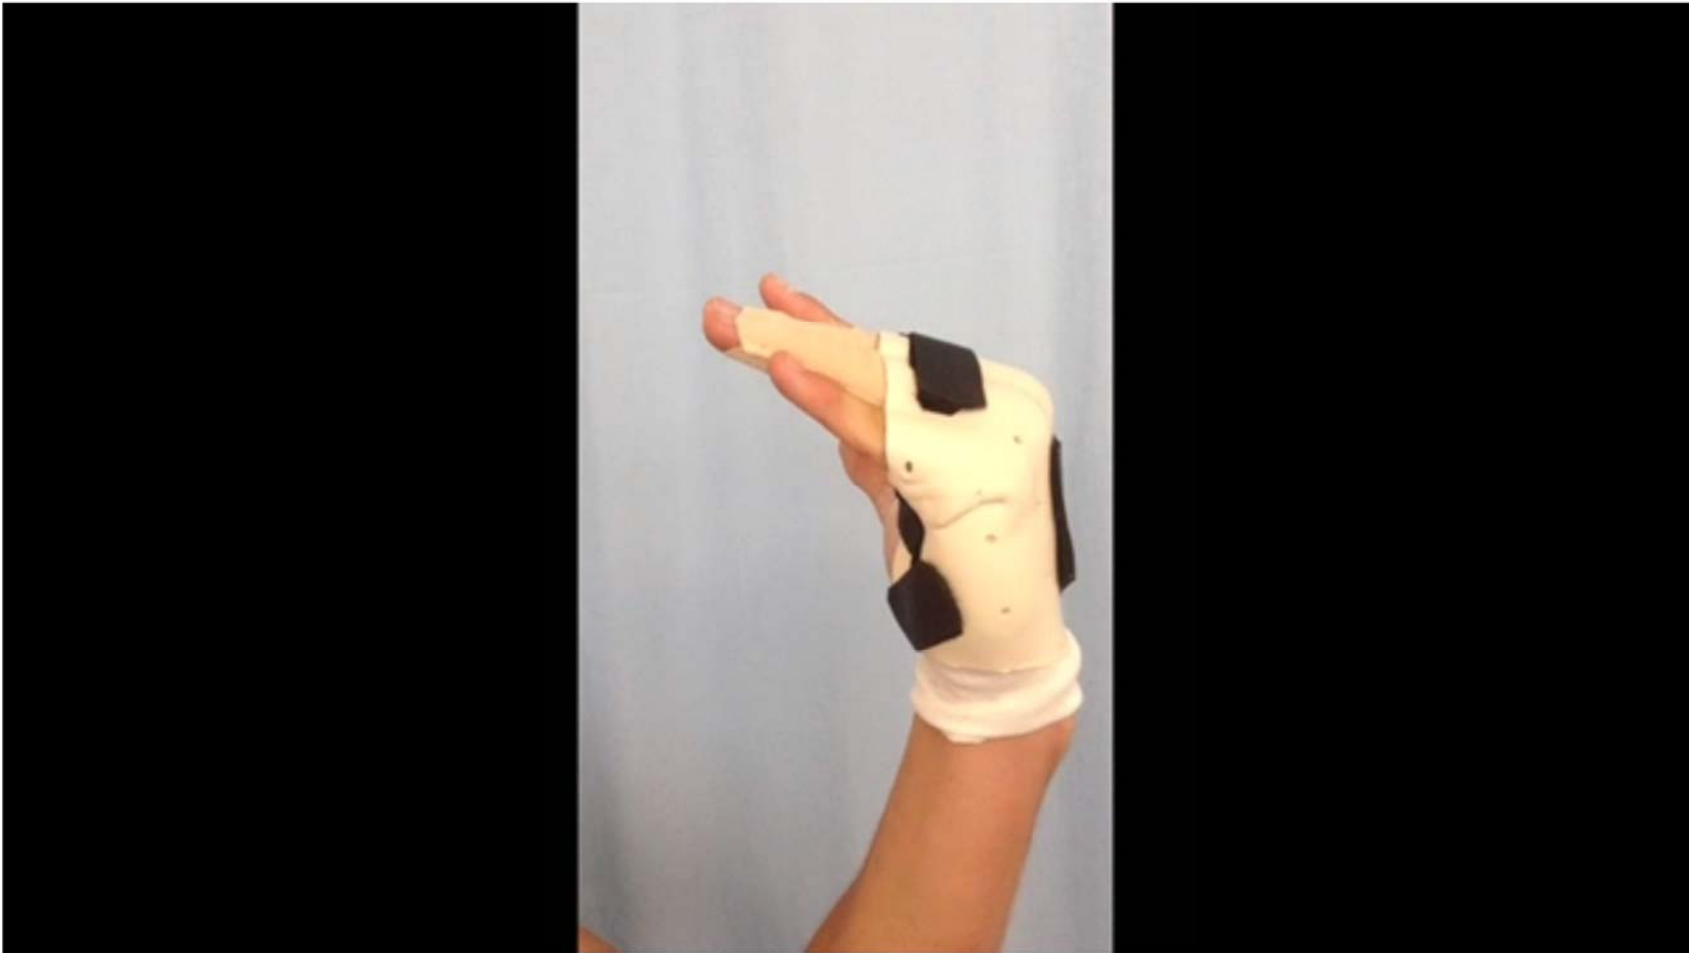

# Case 3

1 week post reduction, lateral view

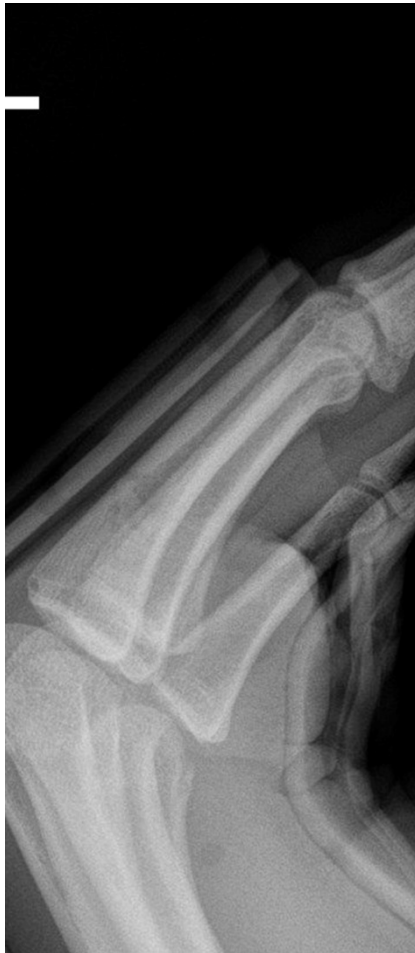

# Case 3

1 week post reduction, PA view

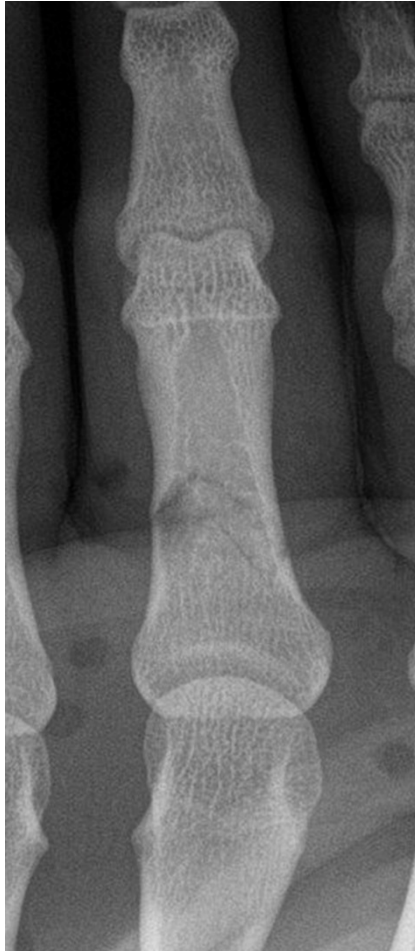

# Case 3

4 week extension

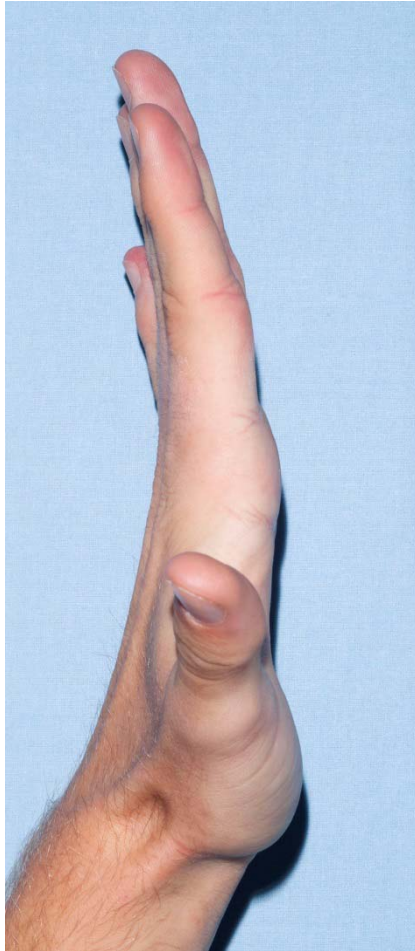

# Case 3

4 week flexion

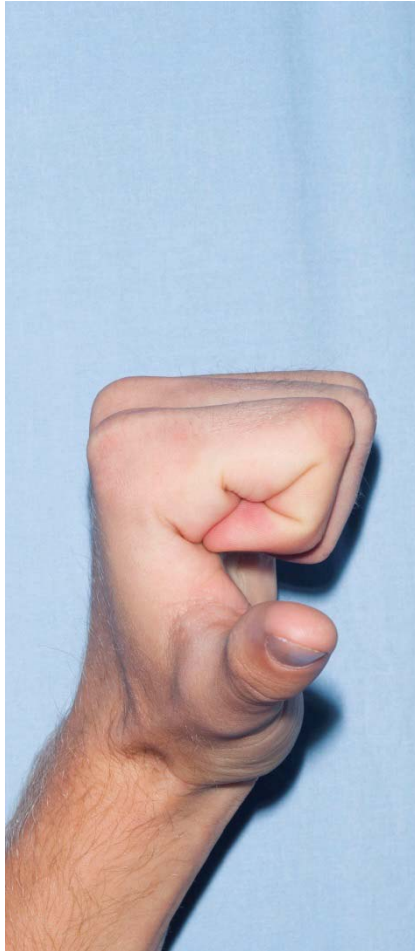

# Case 4

17 year old male, initial presentation, lateral view, right little  
finger

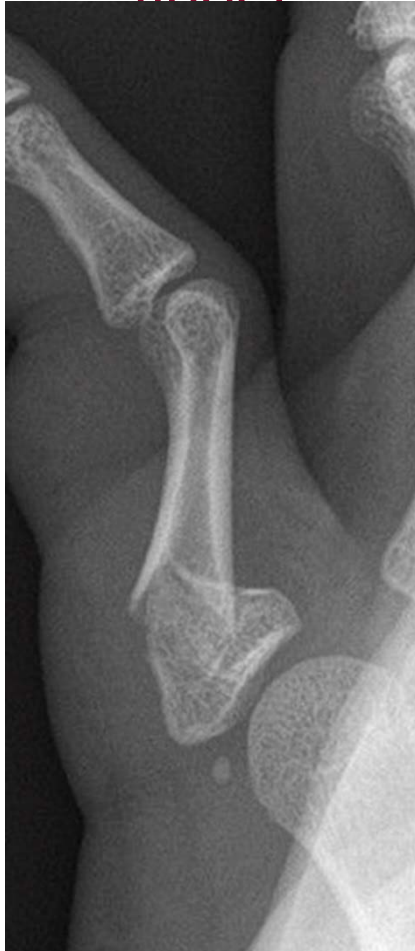

# Case 4

1 week post reduction, lateral view

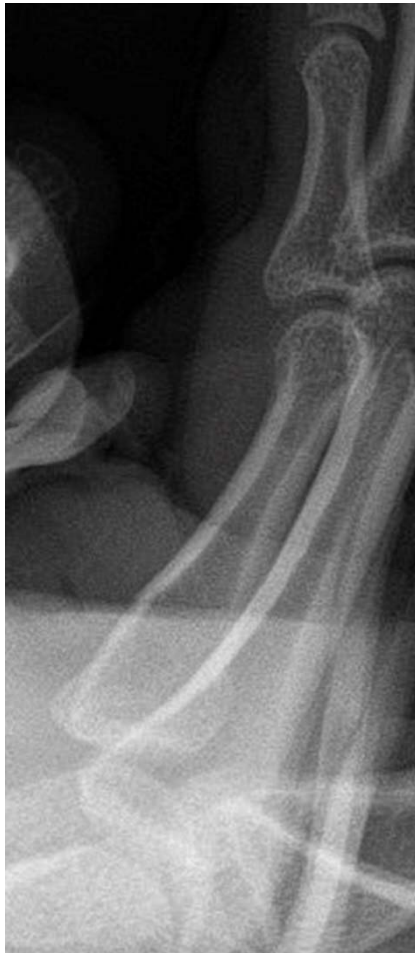

# Case 4

4 week extension

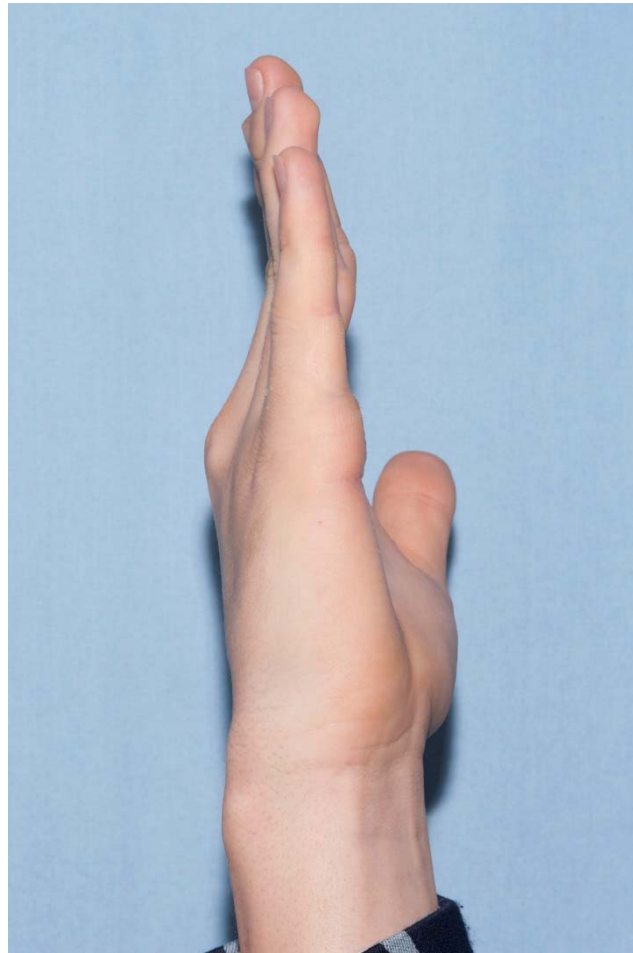

# Case 4

4 week flexion

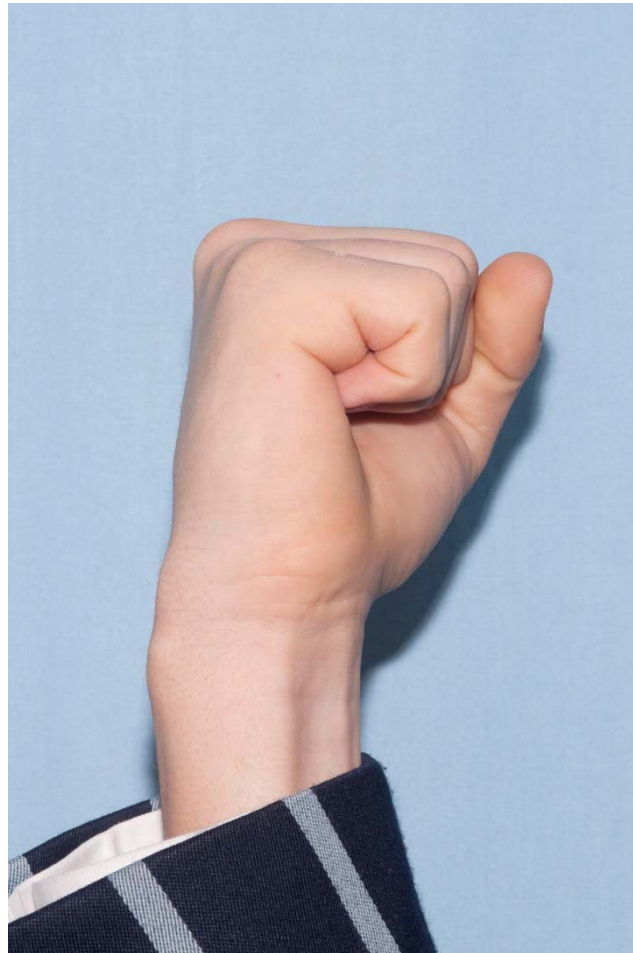

# Case 5

50 year old male, 1 week post splint, AP view, right little  
finger

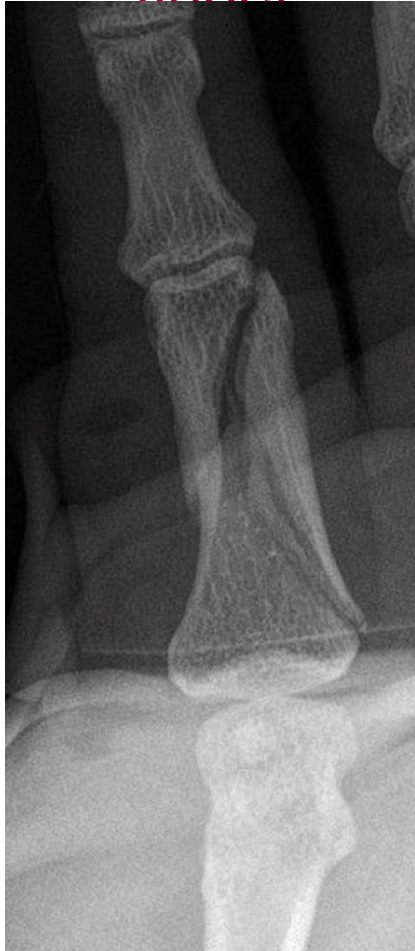

# Case 5

1 week post splint, lateral view

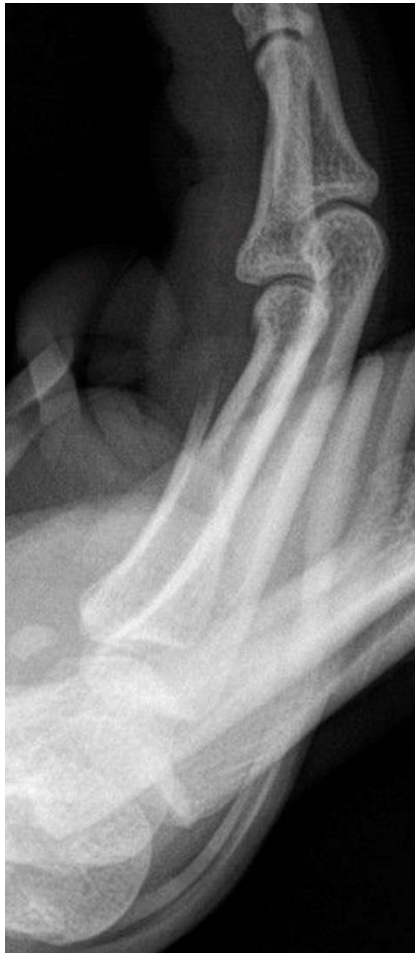

# Case 5

6 week extension

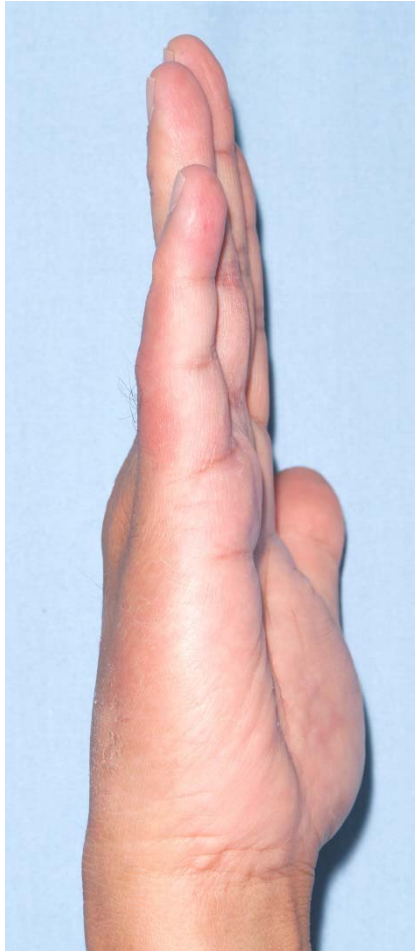

# Case 5

6 week flexion

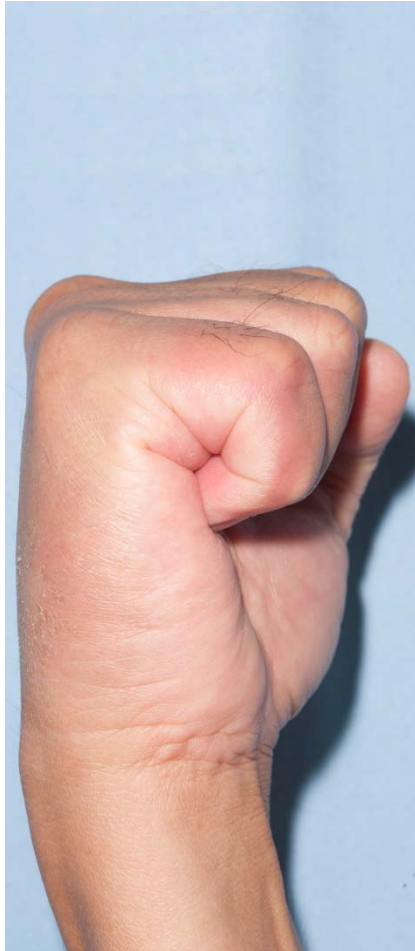

# Case 6

51 year old female, initial presentation, PA view, left little  
finger

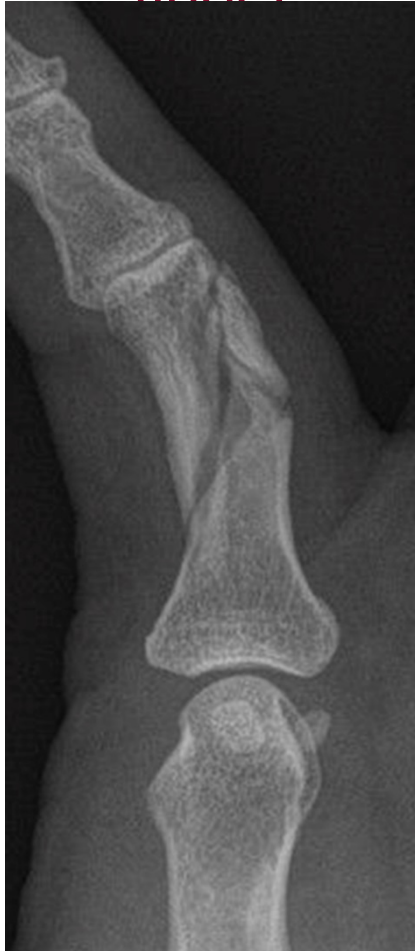

# Case 6

Post reduction, PA view

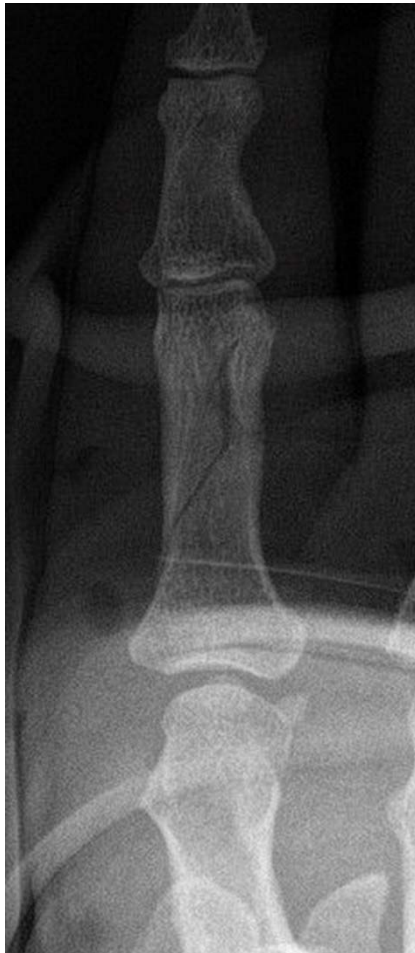

# Case 6

6 week extension

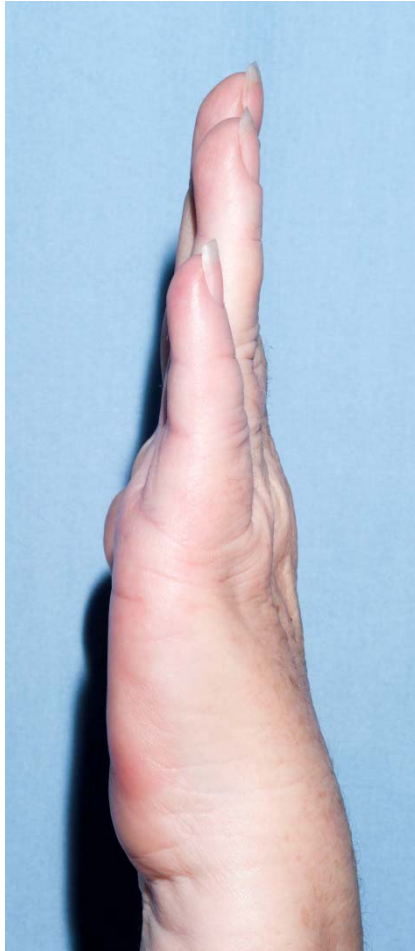

# Case 6

6 week flexion

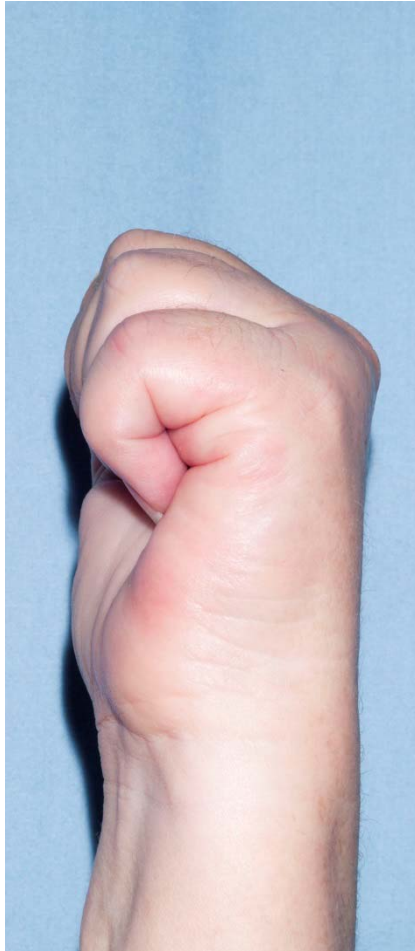

# Case 7

16 year old female, initial presentation, PA view, right little  
finger

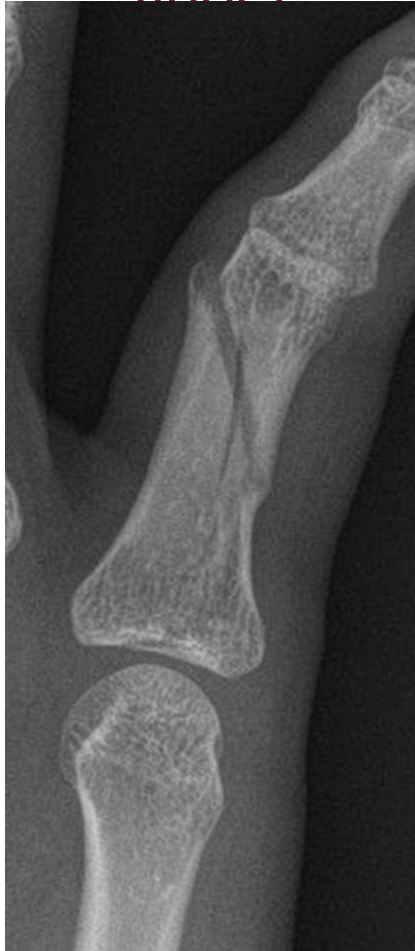

# Case 7

1 week post reduction, AP view

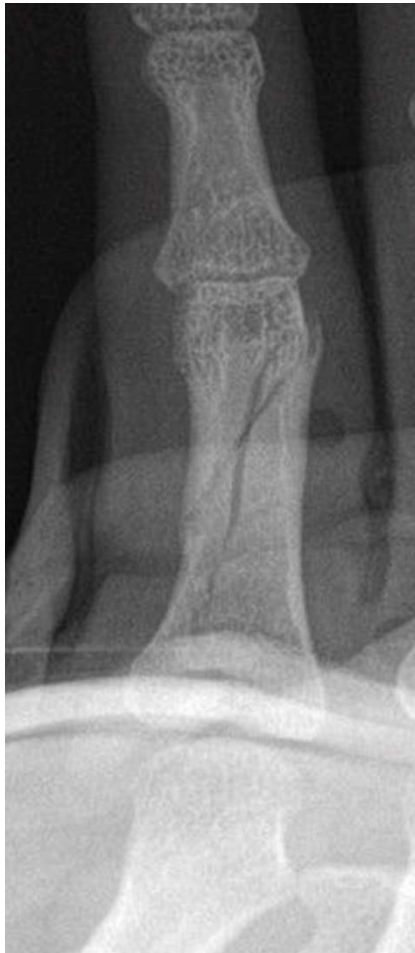

# Case 7

4 week extension

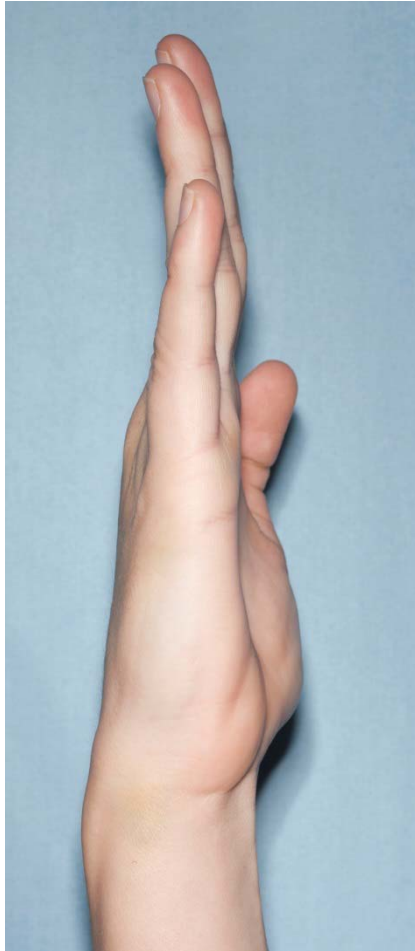

# Case 7

4 week flexion

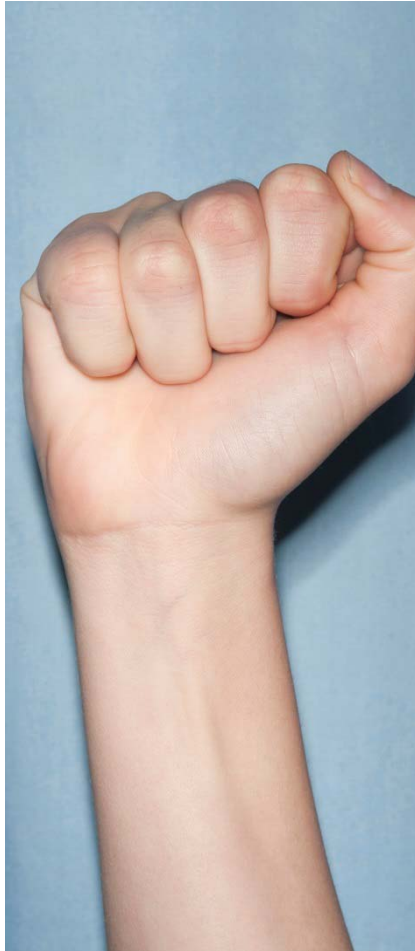

# Case 7

4 week AROM: video

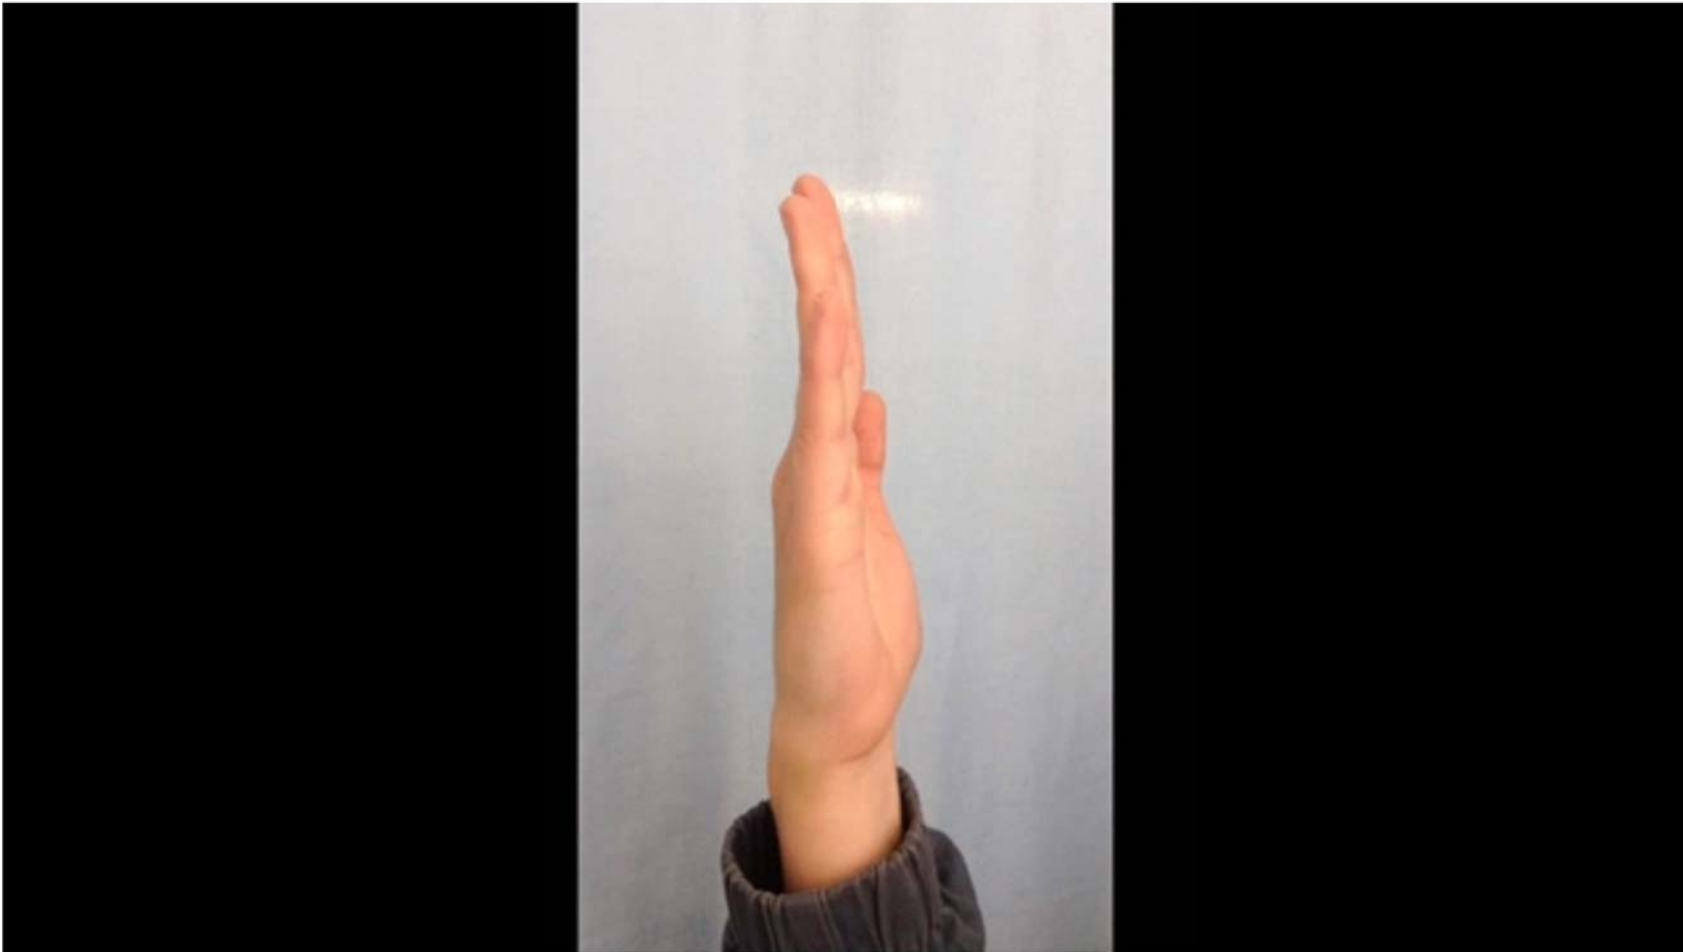

# Case 8

25 year old male, initial presentation, PA view, left little  
finger

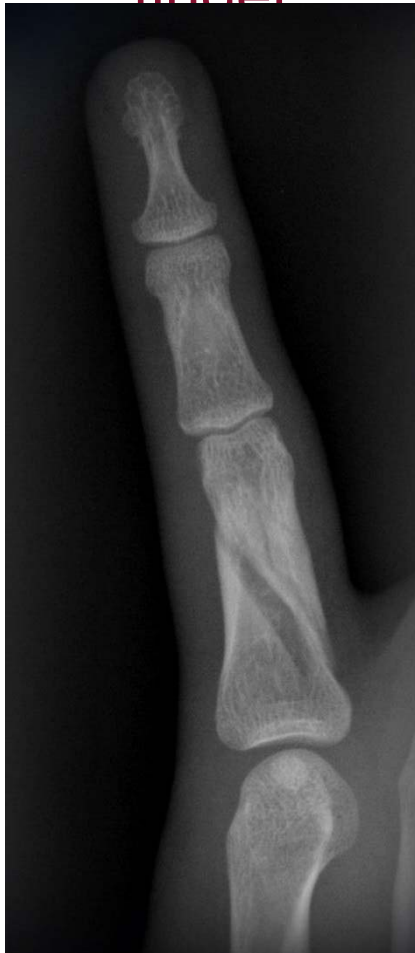

# Case 8

Pre reduction AROM: video

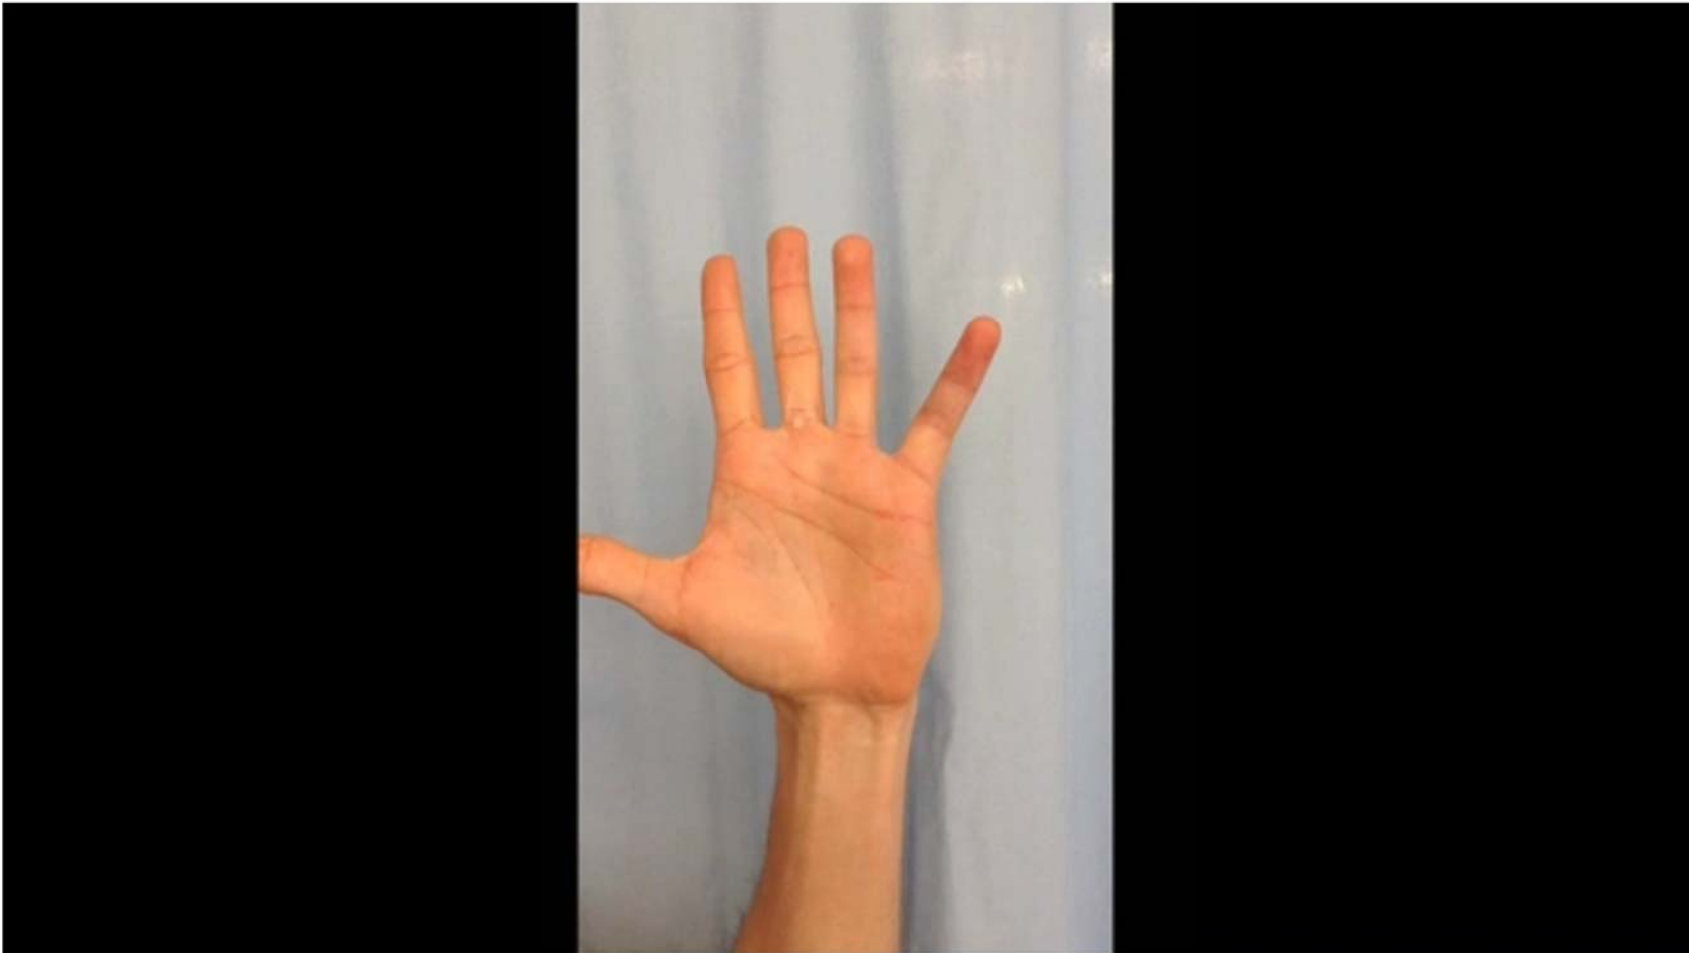

# Case 8

Post reduction AROM: video frontal view

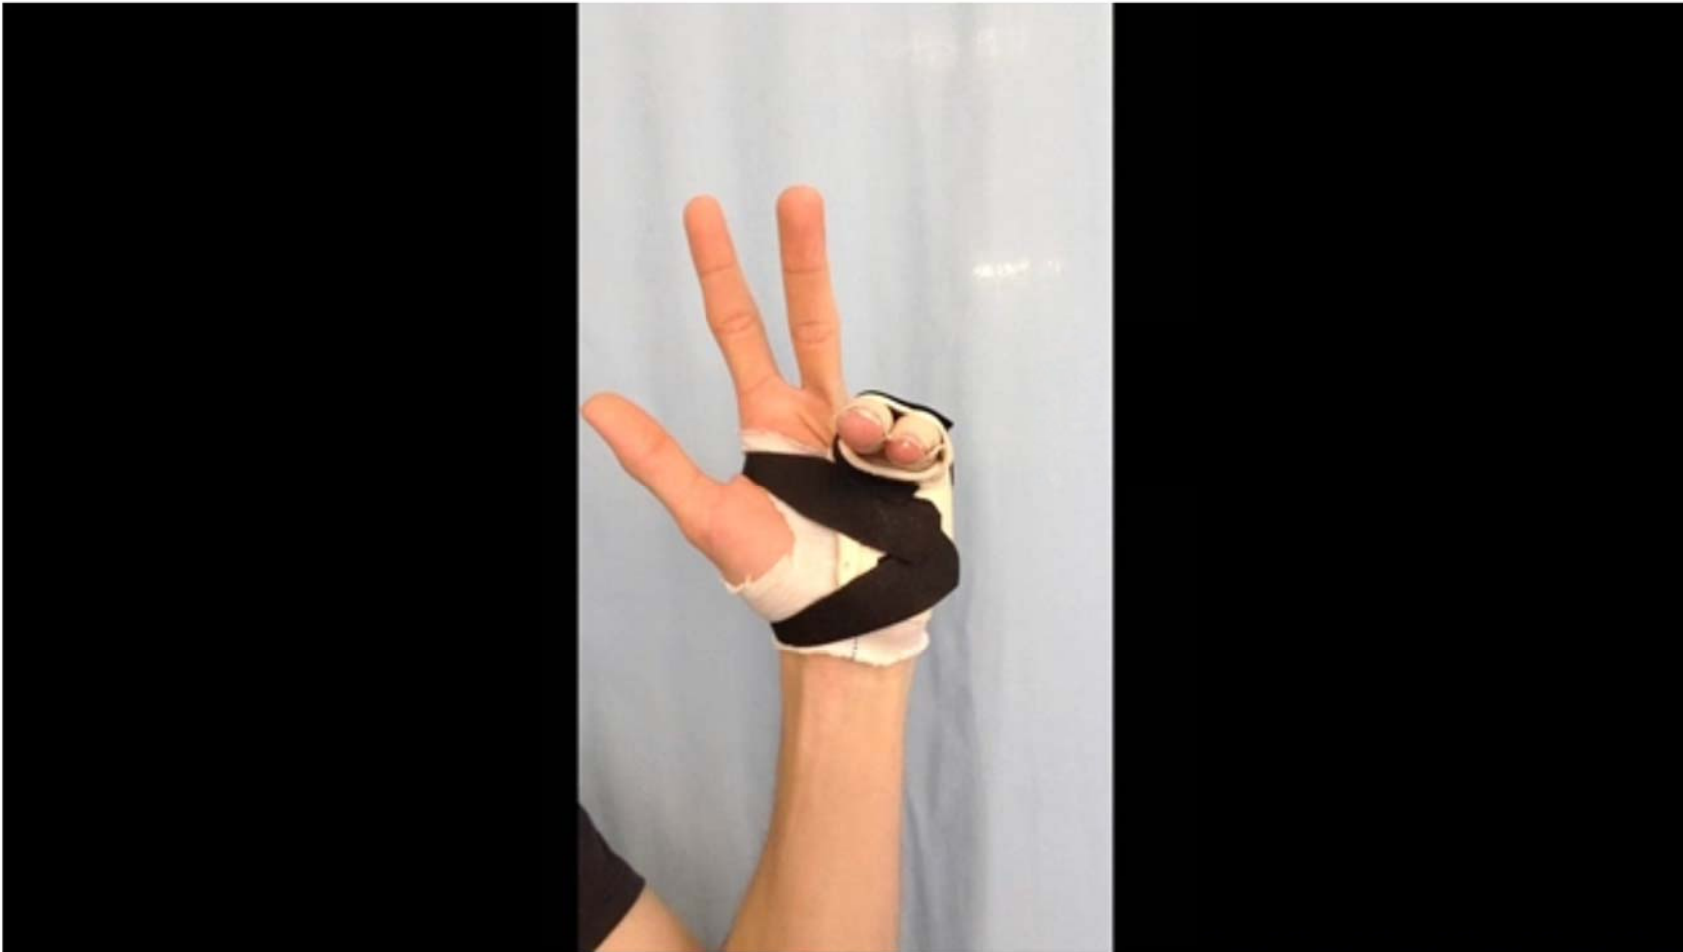

# Case 8

1 week post reduction, AP view

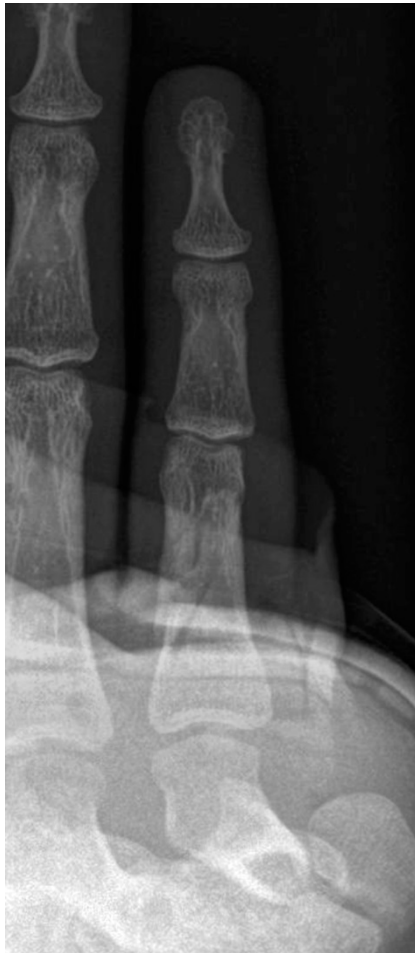

# Case 8

4 week extension

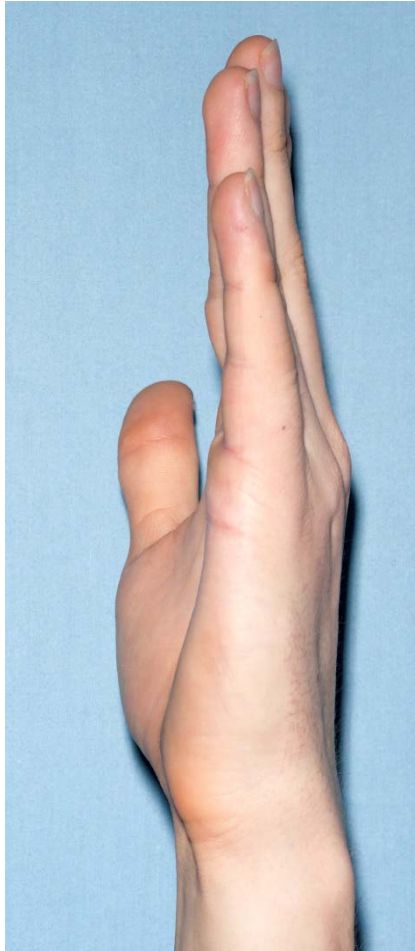

# Case 8

4 week flexion

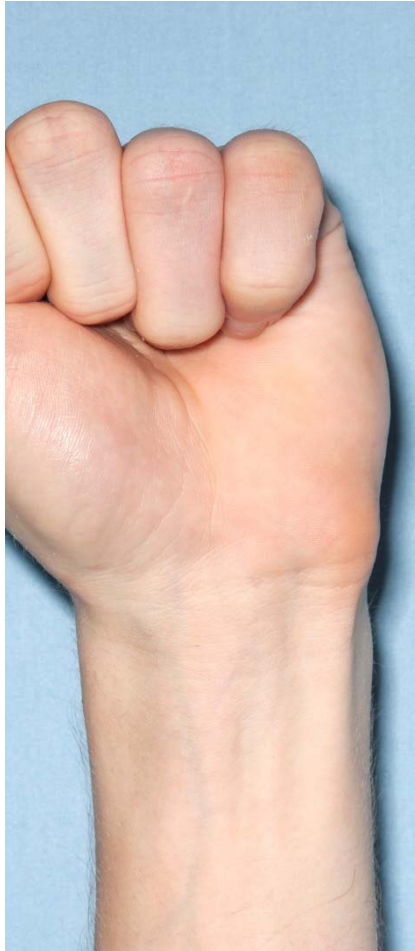

Supplement: Supplementary file 1 [file 18091001]
